# Supplementary material
Source: PubMed Central journal article supplement (PMC7271576)
Supplement: 2019_231159-Disclosures_and_Contributions.pdf [file 2019_231159-Disclosures_and_Contributions.pdf]

Haematologica  
HAEMATOL/2019/231159  
Version 3

PIEZO1 gain-of-function mutations delay reticulocyte maturation in  
hereditary xerocytosis

Pedro L. Moura, Bethan R. Hawley, Johannes G.G. Dobbe, Geert J.  
Streekstra, Minke A.E. Rab, Paola Bianchi, Richard van Wijk, Ashley  
M. Toye, and Timothy J. Satchwell

Disclosures: none

Contributions: PLM performed the majority of experiments, analyzed data and prepared figures; BRH and TJS optimized MS-5 co-culture and performed experiments; JGGD and GJS provided essential ARCA equipment and analysis software. MAER, PB and RvW diagnosed HX patients and provided blood samples and related data. PLM, AMT and TJS conceived and designed experiments and wrote the manuscript. TJS and AMT contributed equally to conception and supervision of the work. All authors read and edited the manuscript.
